# Supplementary material
Source: PubMed Central journal article supplement (PMC6775579)
Supplement: Supplemental_material_9.pdf [file Supplemental_material_9.pdf]

(a)

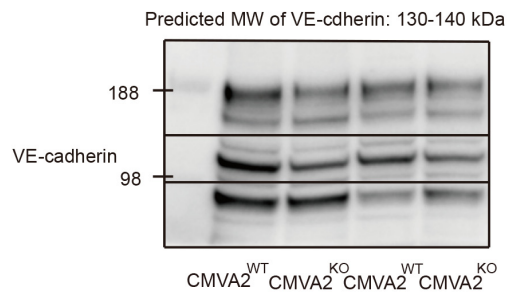

(b)

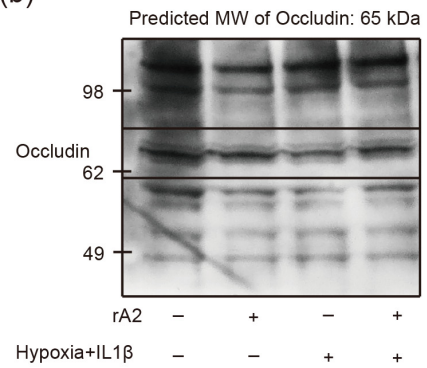

### (Supplementary Figure)

#### Supplementary Figure Legend

**Original blots of VE-cadherin and Occludin.** (a) Western blot of VE-cadherin in isolated CMV of 10-12 weeks old male Anxa2<sup>+/+</sup> (CMVA2<sup>WT</sup>) and Anxa2<sup>-/-</sup> (CMVA2<sup>KO</sup>) mice. (b) Western blot of Occludin in total HBMVEC lysates.
